# Supplementary material for: Effects of Humic Acids on Size and Species Composition of Phytoplankton in a Eutrophic Temperate Estuary
Source: MDPI journal article supplement (doi:10.3390/app122010223), 2022-10-11
Supplement: s1 [file s1]

**Table S1:** Phytoplankton genera/species appeared at the sampling stations during the sampling period in the Yeongsan River estuary.

| Functional Group          | Genera/Species                                                                 | St. A | St. B | St. C |
|---------------------------|--------------------------------------------------------------------------------|-------|-------|-------|
| Bacillariophyta (Diatoms) | <i>Asterionella formosa</i>                                                    | +     | +     | +     |
|                           | <i>Acanthoceras zachariasii</i> (formerly <i>Attheya zachariasii</i> )         |       | +     |       |
|                           | <i>Aulacoseira</i> sp.                                                         | +     | +     |       |
|                           | <i>Chromulina</i> sp.                                                          | +     |       |       |
|                           | <i>Cocconeis placentula</i>                                                    | +     |       | +     |
|                           | <i>Coscinodiscus</i> sp.                                                       | +     |       |       |
|                           | <i>Stephanocyclus meneghinianus</i> (formerly <i>Cyclotella meneghiniana</i> ) | +     | +     | +     |
|                           | <i>Discostella stelligera</i> (formerly <i>Cyclotella stelligera</i> )         | +     | +     | +     |
|                           | <i>Cylindrotheca</i> sp.                                                       | +     |       |       |
|                           | <i>Encyonema leibleinii</i> (formerly <i>Cymbella prostrata</i> )              |       | +     |       |
|                           | <i>Cymbella tumida</i>                                                         | +     | +     | +     |
|                           | <i>Fragilaria capucina</i>                                                     |       |       | +     |
|                           | <i>Fragilaria construens</i>                                                   | +     |       |       |
|                           | <i>Fragilaria crotonensis</i>                                                  | +     |       |       |
|                           | <i>Leptocylindrus</i> sp.                                                      | +     | +     | +     |
|                           | <i>Melosira</i> sp.                                                            | +     | +     |       |
|                           | <i>Melosira varians</i>                                                        |       | +     |       |
|                           | <i>Navicula</i> sp.                                                            | +     | +     | +     |
|                           | <i>Nitzschia acicularis</i>                                                    | +     | +     | +     |
|                           | <i>Nitzschia holsatica</i>                                                     | +     |       |       |
|                           | <i>Nitzschia palea</i>                                                         | +     |       | +     |
|                           | <i>Nitzschia sigma</i>                                                         | +     | +     |       |
|                           | <i>Nitzschia socialis</i>                                                      | +     |       |       |
|                           | <i>Nitzschia</i> sp.                                                           | +     | +     | +     |
|                           | <i>Oocystis</i> sp.                                                            | +     |       | +     |
|                           | <i>Pleurosigma fasiola</i>                                                     | +     |       |       |
|                           | <i>Stephanodiscus</i> sp.                                                      | +     | +     | +     |
|                           | <i>Synedra acus</i>                                                            | +     | +     | +     |
|                           | <i>Synedra ulna</i>                                                            | +     | +     |       |
|                           | <i>Thalassiosira eccentrica</i>                                                | +     | +     |       |
|                           | <i>Thalassiosira</i> sp.                                                       | +     | +     | +     |
|                           | <i>Actinastrum hantzschii</i>                                                  | +     | +     |       |
|                           | <i>Ankistrodesmus fusiformis</i>                                               |       | +     |       |
|                           | <i>Chlamydomonas angulosa</i>                                                  |       |       | +     |
|                           | <i>Chlorogonium euchlorum</i>                                                  |       |       | +     |
|                           | <i>Coelastrum microporum</i>                                                   | +     | +     | +     |
|                           | <i>Coronastrum lunatum</i>                                                     |       |       | +     |
|                           | <i>Cosmarium</i> sp.                                                           |       |       | +     |
|                           | <i>Dictyosphaerium pulchellum</i>                                              | +     | +     | +     |
| Chlorophytes              | <i>Gloeocystis qiqas</i>                                                       |       | +     |       |
|                           | <i>Koliella longiseta</i>                                                      |       | +     |       |
|                           | <i>Micractinium pusillum</i>                                                   | +     |       |       |
|                           | <i>Monoraphidium contortum</i>                                                 | +     | +     | +     |
|                           | <i>Oocystis borgei</i>                                                         |       | +     |       |
|                           | <i>Oocystis</i> sp.                                                            | +     | +     | +     |
|                           | <i>Pandorina morum</i>                                                         | +     |       |       |
|                           | <i>Pediastrum duplex</i>                                                       |       | +     |       |
|                           | <i>Pediastrum duplex Meyen</i>                                                 |       | +     | +     |
|                           |                                                                                |       |       |       |

|                                         |                                                             |   |   |   |
|-----------------------------------------|-------------------------------------------------------------|---|---|---|
|                                         | <i>Scenedesmus acuminatus</i>                               | + | + | + |
|                                         | <i>Scenedesmus ecornis</i>                                  |   |   | + |
|                                         | <i>Scenedesmus opoliensis</i>                               | + | + |   |
|                                         | <i>Scenedesmus quadricauda</i>                              | + |   |   |
|                                         | <i>Tetrastrum</i> sp.                                       |   |   | + |
|                                         | <i>Volvox carteri</i>                                       |   |   | + |
|                                         | <i>Anabaena</i> sp.                                         |   |   | + |
|                                         | <i>Cryptomonas</i> sp.                                      | + |   |   |
| Cyanobacteria (blue-green algae)        | <i>Merismopedia punctata</i>                                |   |   | + |
|                                         | <i>Merismopedia</i> sp.                                     | + |   |   |
|                                         | <i>Microcystis aeruginosa</i>                               | + | + | + |
|                                         | <i>Microcystis</i> sp.                                      |   |   | + |
|                                         | <i>Microcystis wesenbergii</i>                              | + |   |   |
|                                         | <i>Chroomonas</i> spp.                                      | + | + | + |
| Cryptista/Cryptophyceae (cryptophytes)C | <i>Teleaulax acuta</i> (formerly <i>Cryptomonas acuta</i> ) | + | + | + |
|                                         | <i>Cryptomonas erosa</i>                                    | + | + | + |
|                                         | <i>Cryptomonas</i> sp.                                      | + | + | + |
|                                         | <i>Alexandrium</i> sp.                                      |   |   | + |
|                                         | <i>Aulacoseira granulata</i>                                | + | + |   |
|                                         | <i>Aulacoseira</i> sp.                                      |   |   | + |
|                                         | <i>Chromulina</i> sp.                                       | + |   |   |
|                                         | <i>Closterium gracile</i>                                   | + |   |   |
|                                         | <i>Euglena agilis</i>                                       | + |   |   |
|                                         | <i>Euglena oxyuris</i>                                      | + | + |   |
| Other groups                            | <i>Euglena</i> sp.                                          | + | + | + |
|                                         | <i>Melosira</i> sp.                                         | + | + | + |
|                                         | <i>Melosira varians</i>                                     |   | + | + |
|                                         | <i>Phacus</i> sp.                                           | + | + | + |
|                                         | <i>Stauroastrum</i> sp.                                     | + |   |   |
|                                         | <i>Stephanoptera gracilis</i>                               |   |   | + |
|                                         | <i>Synura petersenii</i>                                    | + |   | + |
|                                         | <i>Trachelomonas</i> sp.                                    | + | + | + |

---
